# Supplementary material
Source: publisher figshare collection journal article supplement (https://frontiersin.figshare.com/ndownloader/files/25547654)
Supplement: Supplementary file 1 [file 25547654]

**Supplementary Table S2:** List of enzyme polymerases and the PCR conditions used in this study.

| **Gene** | **Enzyme** | **Temperature profile** |
| --- | --- | --- |
| 18S | TaKaRaExTaq | 95°C (5 min) – [95°C (1 min) – 60°C or 64°C (1 min) – 72°C (1 min)] for 40 cycles – 72°C (5 min) |
| Phusion | 95°C (5 min) – [95°C (1 min) – 60°C or 62°C or 64°C (1 min) – 72°C (1 min)] for 40 cycles – 72°C (5 min) |
| Genotek | 94°C (5 min) – [94°C (1 min) – 50°C or 53°C (1 min) – 72°C (1min)] for 35 cycles – 72°C (5 min) |
| 28S | Taq 5' | 95°C (5 min) – [95°C (1 min) – 55°C (1 min) – 72°C (1 min)] for 40 cycles – 72°C (5 min) |
| TaKaRaExTaq | 95°C (5 min) – [95°C (1 min) – 52°C or 58°C (1 min) – 72°C (1 min)] for 40 cycles – 72°C (5 min) |
| Phusion | 95°C (5 min) – [95°C (1 min) – 52°C (1 min) – 72°C (1 min)] for 40 cycles – 72°C (5 min) |
| Genotek | 94°C (5 min) – [94°C (1 min) – 50°C or 53°C (1 min) – 72°C (1min)] for 35 cycles – 72°C (5 min) |
| COI | Taq 5' | 95°C (5 min) – [95°C (1 min) – 47°C (1 min) – 72°C (1 min)] for 40 cycles – 72°C (5 min) |
